# Supplementary material
Source: PubMed Central journal article supplement (PMC3423199)
Supplement: NIHMS382193-supplement-02.pdf [file NIHMS382193-supplement-02.pdf]

## Supplementary Table 1. Signature genes of sweat gland myoepithelial cells and luminal cells

### A Signature genes of sweat gland myoepithelial cells

| Functional annotation                          | Examples of genes upregulated in sweat gland myoepithelial cells (2x and up, FDR<0.2)                                                                                                                                                       |
|------------------------------------------------|---------------------------------------------------------------------------------------------------------------------------------------------------------------------------------------------------------------------------------------------|
| Smooth muscle contraction                      | Acta2, Actg2, Adcy9, Atp2a2, Cacna1c, Cacnb1, Cacnb4, Cald1, Cyp4a31, Cyp4a10, Itpr1, Kcnmb1, Mrvi1, Myh11, Myl9, Mylk, Prkca, Prkacb, Tpm1, Tpm2                                                                                           |
| Actin cytoskeleton Organization and regulation | Acta1, Acta2, Cald1, Cfl2, Cnn1, Coro1a, Dst, Ehd2, F2r, Fgf7, Fgfr2, Fina, Fhod3, Flnc, Itgav, Maea, Mtss1, Myl6, Myl9, Mylk, Myh11, Myo7a, Nckap1l, Palld, Pdgfa, Pdgfd, Pdlim3, Pdlim7, Pik3r1, Rras, Srf, Sorbs1, Svil, Tpm1, Tpm2, Vcl |
| Cell adhesion<br>ECM<br>Basement membrane      | Cd8b1, Cd86, Cdh2, *Col4a5, *Dag1, *Egfl6, Figf, Flnc, Flna, H2-D1, H2-Aa, H2-Ab1, Itgav, *Lama1, *Lama3, *Lama5, *Lamc2, Myl9, Mylk, Ncam1, *Papln, Pik3r1, Pdgfa, Pdgfd, Prkca, Ptprc, Reln, Vcl, *Vwa1, Zyx                              |
| Ion transport                                  | Atp13a2, ^Atp2a2, ^Cacna1c, ^Cacnb1, ^Cacnb4, Clcn1, Clic4, Coro1a, Cnga2, F2r, ^Itpr1, "Kcnip3, Kctd4, "Kcnk13, Kcnn2, Kcnmb1, "Kcnab1, "Kcnq5, "Scn2a1, Scn8a, "Slc12a5, Slc16a7, "Slc24a3, Steap4, Tes, ^Trpc4, ^Trpv2                   |
| Gland development                              | Dag1, Fgf7, Fgfr2, Irs1, Lama1, Lama5, Mdk, Nog, Nr3c1, Sfrp1, Sema3c, Src, Tes, Tgfbr1, Tnfrsf11a                                                                                                                                          |
| Wnt Signaling pathway                          | Crebbp, Dkk3, Fzd2, Fzd3, Mitf, Nkd1, Ndp, Nxn, Prkca, Prkacb, Sfrp1, Sox4, Tgfb1i1, Ube2b, Vangl1, Wnt6                                                                                                                                    |
| MAPK signaling pathway                         | Cacna1c, Cacnb1, Cacnb4, Dusp10, Fgf7, Fgfr2, Flnc, Flna, Map4k3, Mef2c, Ntf3, Pdgfa, Prkca, Prkacb, Srf, Tgfbr1                                                                                                                            |

\*basement membrane

"Potassium transport

^Calcium transport

### B Signature genes of sweat gland Luminal cells

| Functional annotation                       | Examples of genes upregulated in sweat gland luminal cells (2x and up, FDR<0.2)                                                                                                                                                                                                              |
|---------------------------------------------|----------------------------------------------------------------------------------------------------------------------------------------------------------------------------------------------------------------------------------------------------------------------------------------------|
| Ion transport                               | ^Atp2a3, ^Atp2c1, ^Atp2c2, *Atp6v0a4, *Atp6v0c, *Atp6v0d1, *Atp6v1e1, *Atp6v1f, *Atp6v1g1, Ano1, Ano10, Clcn5, Gabrr2, Grid2, ^Itpr3, ^Mcoln1, "Kcnk1, "Kcnj11, "Kcnmb2, "Kcna1, P2rx4, "Pkm2, "Pklr, Slc22a18, Slc23a1, ^Slc24a6, Slc25a28, Slc5a2, Slc6a8, Slc9a1, Tcn2, ^Tmem37, "Tmem38b |
| Protein transport                           | Arl6ip1, Cd27, Ap1m2, Chmp4c, Chmp6, Dusp18, Gabarapl2, Gm9803, Lmf1, Necap1, Rab15, Rab17, Rab3ip, Rab3a, Rab4a, Rabep2, Selenbp1, Stx1b, Syng1, Vps25                                                                                                                                      |
| Lysosome                                    | Atp6v0a4, Atp6v0c, Atp6v0d1, Gm2a, Ap1m2, Ctsd, Entpd4, Fuca1, Galns, Galcm Neu1, Psap, Scarb2, Cln3                                                                                                                                                                                         |
| Glycolysis/Gluconeogenesis                  | Aldoc, Eno1, Eno3, Gapdh, Hk1, Pfk1, Pfkfb, Pgm2, Pfkfb, Pgm1, Pkm2, Pklr, Tpi1                                                                                                                                                                                                              |
| Fructose and Mannose metabolism             | Aldoc, Hk1, Pfk1, Pfkfb, Pmm1, Tpi1                                                                                                                                                                                                                                                          |
| Pyruvate metabolism                         | Acyp1, Grhpr, Pkm2, Me1, Pcx, Pklr                                                                                                                                                                                                                                                           |
| Galatose metabolism                         | Hk1, Pfk1, Pfkfb, Pgm2                                                                                                                                                                                                                                                                       |
| Amino sugar and nucleotide sugar metabolism | Smas, Cyb5r3, Hk1, Pgm2, Pmm1                                                                                                                                                                                                                                                                |
| Glycan degradation                          | Fuca1, Fuca2, Neu1                                                                                                                                                                                                                                                                           |
| Oxidative phosphorylation                   | Atp6v0a4, Atp6v0c, Atp6v0d1, Atp6v1e1, Atp6v1f, Atp6v1g1, Ndufb7, Lhpb, Cox7a1, Cox17                                                                                                                                                                                                        |
| Type II Diabetes Mellitus                   | Hk1, Mapk3, Kcnj11, Pkm2, Pklr                                                                                                                                                                                                                                                               |

"Potassium transport

^Calcium transport

\*Hydrogen transport

## Supplementary Table 2. Similarities shared between sweat gland and mammary gland

### A Upregulated genes shared in myoepithelial cell of sweat gland and mammary gland

| Functional annotation             | Examples of genes upregulated in Myo (compared to Lum) in both sweat gland and mammary gland                                                                                                                                                                                   |
|-----------------------------------|--------------------------------------------------------------------------------------------------------------------------------------------------------------------------------------------------------------------------------------------------------------------------------|
| Cell adhesion (Basement membrane) | Actn1, Cav1, Cav3, Col4a1, Col4a2, Col4a6, Col5a2, Col7a1, Col17a1, Ccnd2, Egfr, Egfl6, Flna, Grlf1, Itga4, Itga6, Itga9, Ilk, Lamb1-1, Lama1, Lama3, Lama5, Lamb3, Lamc1, Myl9, Mylk, Nid1, Parvb, Pxn, Pik3ca, Pdgfa, Pdgfc, Pdgfd, Bcl2, Reln, Sparc, Tln1, Vav3, Vcl, Vwa1 |
| Smooth muscle contraction         | Acta2, Actg2, Adora2b, Adcy3, Adcy7, Avpr1a, Cald1, Gucy1b3, Kcnma1, Kcnmb2, Mrvi1, Myh11, Myl6, Myl9, Mylk, Npr2, Ramp1, Ramp3                                                                                                                                                |
| Regulation of actin cytoskeleton  | Actn1, F2r, Cfl2, Cyfp2, Diap2, Egfr, Fgf13, Fgf3, Fgf7, Itga4, Itga6, Itga9, Myl9, Mylk, Pxn, Pik3ca, Pip4k2a, Pdgfa, Pdgfc, Pdgfd, Kras, Vav3, Vcl                                                                                                                           |
| TGFb signaling pathway            | Smad1, Acvr1, Bmp6, Bmp7, Bmpr2, Fst, Id4, Tgfb3, Tgfbr1                                                                                                                                                                                                                       |
| Wnt pathway                       | Dkk3, Fzd3, Fzd7, Fzd8, Nxn, Sostdc1, Sfrp1, Tcf7l1, Tcf7, Tgfb1i1, Wnt10a, Wnt3, Wnt9b                                                                                                                                                                                        |
| Hedgehog pathway                  | Gli1, Gli2, Bmp6, Bmp7, Gas1, Wnt10a, Wnt3, Wnt9b                                                                                                                                                                                                                              |
| Calcium signaling pathway         | Atp2a2, Adora2b, Adcy3, Adcy7, Avpr1a, Bst1, Camk4, F2r, Cysltr1, Egfr, Mylk, Ryr2, Camk2g, Slc25a4, Slc8a1, Sphk1, Trpc1                                                                                                                                                      |
| JAK-STAT pathway                  | Clcf1, Ccnd2, Ifna1, Ifna12, Ifna5, Ifna6, Ifna7, Ifna9, Ifnab, Il10, Il6, Il7, Lifr, Osmr, Pik3ca, Il2rg, Spry1, Spred1, Socs3, Tpo                                                                                                                                           |
| Pathways in cancer                | Gli1, Gli2, Col4a1, Col4a2, Col4a6, Egfr, Fgf13, Fgf3, Fgf7, Fzd3, Fzd7, Fzd8, Itga6, Il6, Lamb1-1, Lama1, Lama3, Lama5, Lamb3, Lamc1, Mmp2, Pik3ca, Pdgfa, Bcl2, Kras, Tcf7l1, Tcf7, Tgfb3, Tgfbr1, Wnt10a, Wnt3, Wnt9b                                                       |

\*Basement membrane

### B Upregulated genes shared in luminal cell of sweat gland and mammary gland

| Functional annotation          | Examples of genes upregulated in Lum (compared to Myo) in both sweat gland and mammary gland                                                                                                              |
|--------------------------------|-----------------------------------------------------------------------------------------------------------------------------------------------------------------------------------------------------------|
| Cell adhesion (Tight junction) | CD80, Cldn1, Cldn10a, Cldn3, Cldn4, Cldn7, H2-L, H2-D1, H2-K1, H2-Q10, Itga4, Ocln, Sele, Cask, Crb3, Myh14, Pard6b, Tjp3, Evpl, Shroom3                                                                  |
| Gland development              | Bcl2l11, Cited2, Elf5, Notch1, Sox9, Tbx3, Ccnd1, Ddr1, Eif2ak3, Fgf10, Foxa1, Foxc1, Hes1, Otp, Prlr, Pml, Rln1, Stat5a, Ntn1, Tcfcp2l1                                                                  |
| Notch pathway                  | Notch1, Notch3, Notch4, Rfng, Hes1, Psen1                                                                                                                                                                 |
| Carbohydrate metabolism        | Dera, Pgl3, Fbp2, G6pd2, G6pdx, H6pd, Pgd, Rbks, Taldo1, Tkt, Bpgm, Aldoart2, Dcxr, Eno3, Fbp2, Mdh1, Pck1                                                                                                |
| Ion transport                  | Atp2c2, Atp6v0b, Kcnip4, Kcnip1, Lasp1, Cacna2d2, Cacng8, Catsper1, Clcn3, Clcn5, Kcnk1, Kcnk5, Kcnn4, Kcne3, Kcnd3, Kcnab3, Scnn1a, Scnn1b, Slc12a1, Slc12a2, Slc22a23, Slc31a1, Slc4a8, Slc5a1, Slco1a5 |

\*Tight junction
